# Supplementary material
Source: PubMed Central journal article supplement (PMC5556823)
Supplement: JCOPDF-2-268-s001.pdf [file JCOPDF-2-268-s001.pdf]

## Online Supplement

### **CD4+ T-Cell Profiles and Peripheral Blood Ex-Vivo Responses to T-Cell Directed Stimulation Delineate COPD Phenotypes**

Mustimbo E. P. Roberts, PhD<sup>1</sup> Brandon W. Higgs, PhD<sup>1</sup> Philip Brohawn, BS<sup>1</sup> Fernanda Pilataxi, BA<sup>1</sup> Xiang Guo, PhD<sup>1</sup> Michael Kuziora, PhD<sup>1</sup> Russell P. Bowler, MD, PhD<sup>2</sup> Wendy I. White, PhD<sup>1</sup>

**Flow Cytometry.** Whole blood from COPD patients and control individuals were used for flow cytometry assays. Complete blood counts (CBC), in combination with flow cytometric analyses, were used to enumerate the numbers of T cells, T-cell subsets and monocytes. Whole blood was aliquoted and 200 $\mu$ Ls used for each flow cytometry assay. The following anti-human antibodies were used for whole blood staining of T-cell subsets; anti-CD3 AF 700 (eBiosciences, San Diego, CA), anti-CD4 PE-Cy5 (eBiosciences), anti-CD8 PE-Cy7 (eBiosciences), anti-CD45RA Qdot605 (Life Technologies, Carlsbad, CA), anti-CCR7 BV421 (BioLegend, San Diego, CA), anti-CCR5 A488 (BioLegend), anti-CD146 PE (BD Biosciences, San Jose, CA), and anti-CD19 APCeFluor780 (eBiosciences). The following anti-human antibodies were used for whole blood staining of monocyte subsets; anti-CD14 FITC (eBiosciences), anti-CD16 PE-Cy7 (eBiosciences), anti-CD45 APCeFluor780 (eBiosciences), anti-HLA-DR A700 (eBiosciences), anti-CCR2 PE-Cy5 (Biolegend), anti-CD56 PerCpCy5.5 (BioLegend). After antibody staining, BDFACS lyse (BDBiosciences) was used to remove red blood cells. Cells were washed and fixed with IC fixation buffer (eBiosciences). The fixed samples were analyzed on a 5-laser LSRII flow cytometer (BD, Franklin Lakes, NJ). FlowJo version 9.1 (TreeStar, Ashland, OR) was used for analysis of flow cytometry data.

**Cellular Isolations.** Peripheral blood mononuclear cells (PBMC) were isolated from whole blood using Ficoll-Paque (GE Healthcare, Piscataway, New Jersey) density gradient centrifugation. Positive selection was used to purify cells as it results in improved purity over negative selection, and there are no significant consistent differences in expression data between the two methods.<sup>1</sup> Briefly, CD8<sup>+</sup> T cells were isolated from PBMC samples by magnetic selection using CD8 microbeads (all microbeads for cellular isolations from Miltenyi Biotech). The CD8<sup>+</sup> depleted PBMC fraction was used to isolate CD14<sup>+</sup> cells using CD14 microbeads. The remaining PBMC sample (CD8 and CD14 depleted), was used to isolate CD4<sup>+</sup> T cells using CD4 microbeads. Cell purity was assessed by flow cytometry. Isolated cell subset pellets were stored in buffer RLT (Qiagen, Valencia, California) plus 1% 2-mercaptoethanol (Sigma Aldrich) at -80°C.

**Table S1. TruCulture Analysis**

| Analytes                                                            | CTRL<br>Median | COPD<br>Median | FC     | <i>P</i> |     |
|---------------------------------------------------------------------|----------------|----------------|--------|----------|-----|
| Alpha-1-Antitrypsin (AAT)mg/mL                                      | 0.6            | 0.615          | 1.03   | 0.6943   |     |
| Alpha-2-Macroglobulin (A2Macro)mg/mL                                | 0.64           | 0.59           | -1.08  | 0.2809   |     |
| Beta-2-Microglobulin (B2M)ug/mL                                     | 0.56           | 0.56           | 1.00   | 0.1913   |     |
| Brain-Derived Neurotrophic Factor (BDNF)ng/mL                       | 8.3            | 7.45           | -1.11  | 0.1298   |     |
| C-Reactive Protein (CRP)ug/mL                                       | 0.74           | 1.8            | 2.43   | 0.2045   |     |
| Complement C3 (C3)mg/mL                                             | 0.42           | 0.415          | -1.01  | 0.4818   |     |
| Eotaxin-1pg/mL                                                      | 209            | 202.5          | -1.03  | 0.4157   |     |
| Factor VII ng/mL                                                    | 219            | 183            | -1.20  | 0.8298   |     |
| Ferritin (FRTN)ng/mL                                                | 55             | 57             | 1.04   | 0.5843   |     |
| Fibrinogen mg/mL                                                    | 1.3            | 1.4            | 1.08   | 0.7311   |     |
| Granulocyte-Macrophage Colony-Stimulating<br>Factor (GM-CSF) pg./mL | 696            | 49             | -14.20 | 0.0079   | *,# |
| Haptoglobin mg/mL                                                   | 0.035          | 0.035          | 1.00   | 0.4163   |     |
| Intercellular Adhesion Molecule 1 (ICAM-1)ng/mL                     | 60             | 59.5           | -1.01  | 0.8187   |     |
| Interferon gamma (IFN-gamma) pg/mL                                  | 1940           | 321.5          | -6.03  | 0.0054   | *,# |
| Interleukin-1 alpha (IL-1 alpha)ng/mL                               | 0.0074         | 0.00405        | -1.83  | 0.0269   | *,# |
| Interleukin-1 beta (IL-1 beta)pg/mL                                 | 61             | 36.5           | -1.67  | 0.2467   |     |
| Interleukin-1 receptor antagonist (IL-1ra)pg/mL                     | 1660           | 2050           | 1.23   | 0.7217   |     |
| Interleukin-2 (IL-2)pg/mL                                           | 639            | 452            | -1.41  | 0.1659   |     |
| Interleukin-3 (IL-3)ng/mL                                           | 0.0069         | 0.0069         | 1.00   | 0.3418   |     |
| Interleukin-4 (IL-4)pg/mL                                           | 523            | 403            | -1.30  | 0.2146   |     |
| Interleukin-5 (IL-5)pg/mL                                           | 236            | 137.5          | -1.72  | 0.3601   |     |
| Interleukin-6 (IL-6)pg/mL                                           | 81             | 60.5           | -1.34  | 0.0030   | *   |
| Interleukin-7 (IL-7)pg/mL                                           | 12             | 12             | 1.00   | 0.4420   |     |
| Interleukin-8 (IL-8)pg/mL                                           | 8190           | 8175           | -1.00  | 0.8253   |     |
| Interleukin-10 (IL-10)pg/mL                                         | 614            | 423.5          | -1.45  | 0.0442   | *   |
| Interleukin-12 Subunit p40 (IL-12p40)ng/mL                          | 0.28           | 0.28           | 1.00   | 0.3355   |     |
| Interleukin-12 Subunit p70 (IL-12p70)pg/mL                          | 49             | 49             | 1.00   | 0.6209   |     |
| Interleukin-15 (IL-15)ng/mL                                         | 0.39           | 0.39           | 1.00   | 0.4917   |     |
| Interleukin-17 (IL-17)pg/mL                                         | 46             | 23.5           | -1.96  | 0.1639   |     |
| Interleukin-18 (IL-18)pg/mL                                         | 154            | 170            | -0.91  | 0.3691   |     |
| Interleukin-23 (IL-23)ng/mL                                         | 0.46           | 0.46           | 1.00   | 0.7814   |     |
| Macrophage Inflammatory Protein-1 alpha (MIP-1<br>alpha)pg/mL       | 8080           | 5195           | -1.56  | 0.1774   |     |
| Macrophage Inflammatory Protein-1 beta (MIP-1<br>beta)pg/mL         | 102000         | 81150          | -1.26  | 0.3780   |     |
| Matrix Metalloproteinase-2 (MMP-2)ng/mL                             | 78             | 79             | 1.01   | 0.6379   |     |
| Matrix Metalloproteinase-3 (MMP-3)ng/mL                             | 5.4            | 5.6            | 1.04   | 0.8381   |     |
| Matrix Metalloproteinase-9 (MMP-9)ng/mL                             | 40             | 40             | 1.00   | NA       |     |

|                                                        |      |      |       |        |     |
|--------------------------------------------------------|------|------|-------|--------|-----|
| Monocyte Chemotactic Protein 1 (MCP-1)pg/mL            | 6110 | 7550 | 1.24  | 0.9794 |     |
| Stem Cell Factor (SCF)pg/mL                            | 116  | 116  | 1.00  | 0.4602 |     |
| T-Cell-Specific Protein RANTES (RANTES)ng/mL           | 17   | 16   | -1.06 | 0.9242 |     |
| Tissue Inhibitor of Metalloproteinases 1 (TIMP-1)ng/mL | 51   | 57   | 1.12  | 0.7913 |     |
| Tumor Necrosis Factor alpha (TNF-alpha)pg/mL           | 5520 | 1810 | -3.05 | 0.0071 | *,# |
| Tumor Necrosis Factor beta (TNF-beta)pg/mL             | 62   | 25   | -2.48 | 0.0177 | *,# |
| Tumor necrosis factor receptor 2 (TNFR2)ng/mL          | 2    | 1.9  | -1.05 | 0.9396 |     |
| Vascular Cell Adhesion Molecule-1 (VCAM-1)ng/mL        | 145  | 159  | 1.10  | 0.8385 |     |
| Vascular Endothelial Growth Factor (VEGF)pg/mL         | 90   | 75   | -1.20 | 0.3302 |     |
| Vitamin D-Binding Protein (VDBP)ug/mL                  | 57   | 83   | 1.46  | 0.5705 |     |
| von Willebrand Factor (vWF)ug/mL                       | 21   | 25   | 1.19  | 0.6235 |     |

\* =  $p < 0.05$ , # FC > 1.5

**Table S2. Individual Cytokine Correlation with FEV<sub>1</sub> in COPD Patients**

|                | FEV <sub>1</sub> %<br>Predicted<br>vs.<br>GM-CSF | FEV <sub>1</sub> %<br>Predicted<br>vs.<br>IFN- $\gamma$ | FEV <sub>1</sub> %<br>Predicted<br>vs.<br>IL-1 $\alpha$ | FEV <sub>1</sub> %<br>Predicted<br>vs.<br>TNF- $\alpha$ | FEV <sub>1</sub> %<br>Predicted<br>vs.<br>TNF- $\beta$ |
|----------------|--------------------------------------------------|---------------------------------------------------------|---------------------------------------------------------|---------------------------------------------------------|--------------------------------------------------------|
| <i>r</i>       | 0.32                                             | 0.29                                                    | 0.10                                                    | 0.28                                                    | 0.26                                                   |
| <i>P</i> value | 0.02                                             | 0.03                                                    | 0.50                                                    | 0.05                                                    | 0.06                                                   |

**Table S3. Stimulation Index of Individual Cytokines that Constitute the T-Cell Stimulation Score (study population, COPD and smoker controls)**

|                             | GM-CSF<br>(pg/ml)<br>Median | IFN- $\gamma$<br>(pg/ml)<br>Median | IL-1 $\alpha$<br>(ng/ml)<br>Median | TNF- $\alpha$<br>(pg/ml)<br>Median | TNF- $\beta$<br>(pg/ml)<br>Median |
|-----------------------------|-----------------------------|------------------------------------|------------------------------------|------------------------------------|-----------------------------------|
| $\alpha$ -CD3/ $\alpha$ -28 | 126.00                      | 370.00                             | 0.0051                             | 2500.00                            | 30.00                             |
| null                        | 49.00                       | 1.70                               | 0.0020                             | 12.00                              | 9.10                              |
| stim Index                  | 2.57                        | 217.65                             | 2.55                               | 208.33                             | 3.30                              |

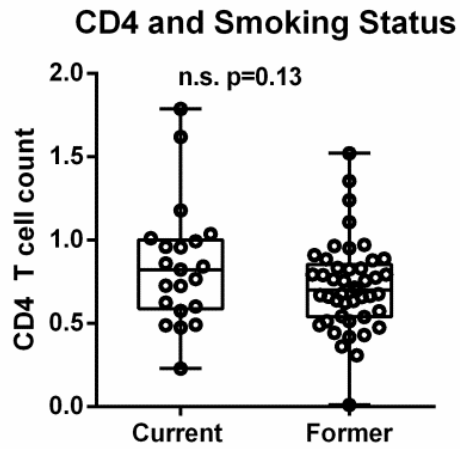

**Figure S1.** The numbers of CD4+ T cells are not significantly different between current and former smokers in the study cohort. Flow cytometry was used to enumerate CD4+ T cells. The CD4+ T-cell count was compared, using all individuals in the cohort, between current and former smokers.  $P < 0.05$  was considered significant using unpaired t-test.

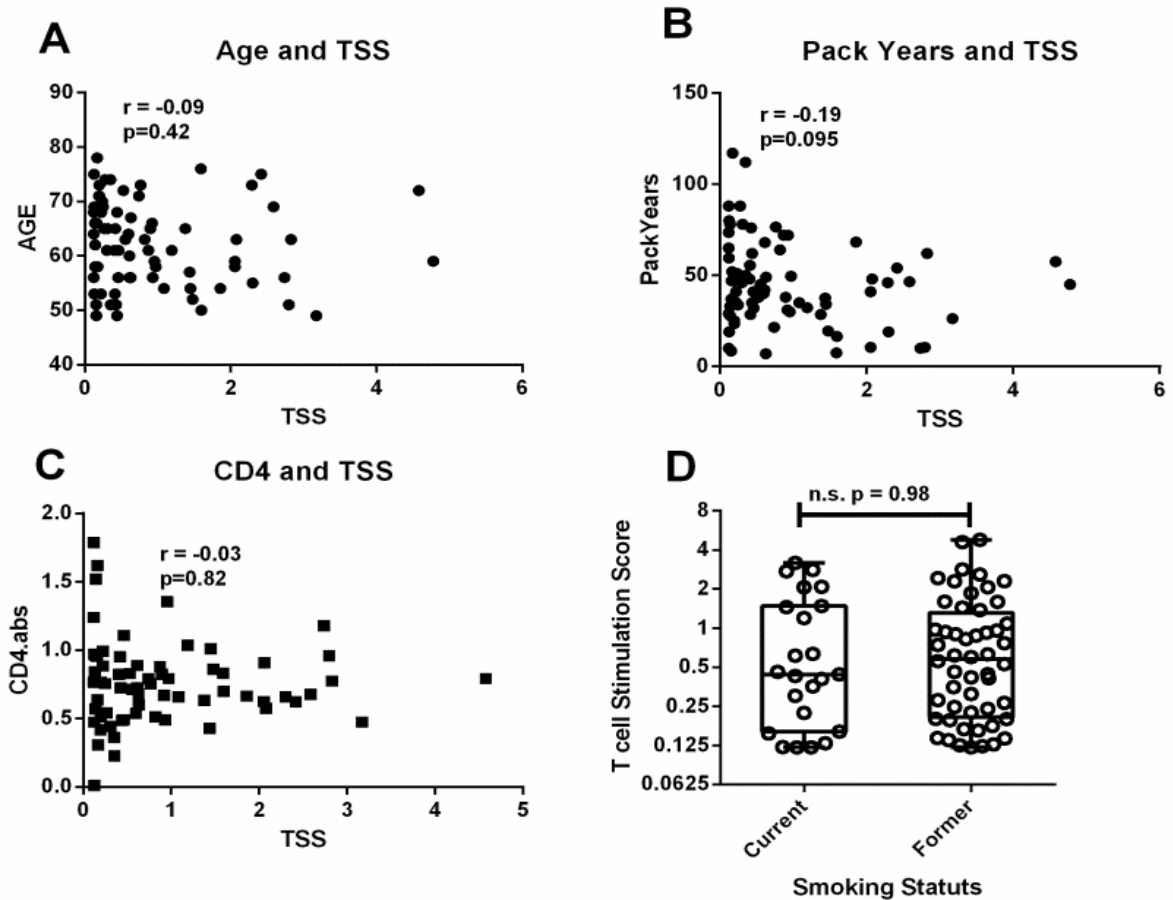

**Figure S2.** Relationship between T-cell stimulation score (TSS) and age, pack years, CD4+ T-cell number or smoking status is not significant. A.-C. TSS, of the entire cohort, was correlated to age, pack years, and CD4+ T-cell number.  $P < 0.05$  was considered significant using Pearson's correlation. D. TSS, in the entire cohort, was compared between current and former smokers.  $P < 0.05$  was considered significant using unpaired t-test.

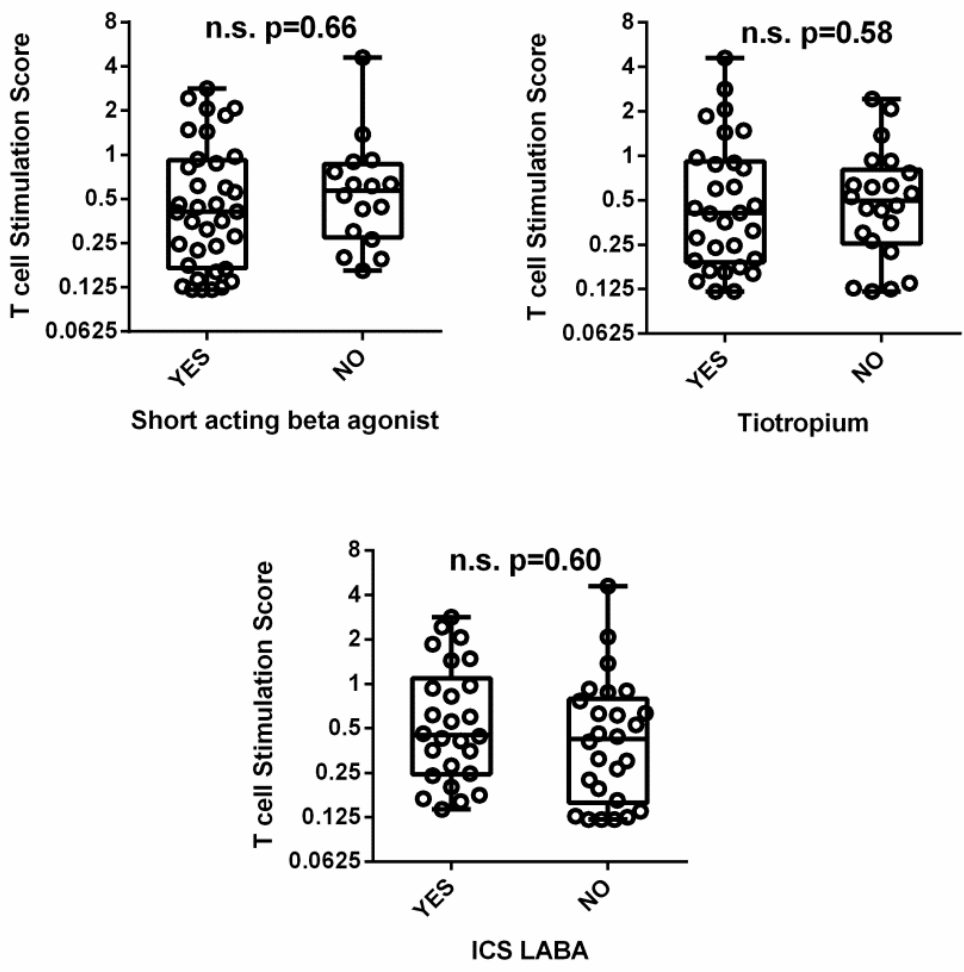

**Figure S3.** The relationship between T-cell stimulation score (TSS), among patients with COPD, and COPD medication usage was not significant. The TSS was compared between patients with COPD currently using (YES) or not currently using (NO) the indicated medications.  $P < 0.05$  was considered significant using unpaired t-test.



## References

1. Lyons PA, Koukoulaki M, Hatton A, Doggett K, Woffendin HB, Chaudhry AN, Smith KG. Microarray analysis of human leucocyte subsets: The advantages of positive selection and rapid purification. *BMC Genomics*. 2007;8:64.
